# Supplementary material for: The influence of increasing mineral fertilizer application on nitrogen leaching of arable land and grassland—results of a long-term lysimeter study
Source: Frontiers journal article supplement (doi:10.3389/fsoil.2024.1345073), 2024-03-05
Supplement: Data_Sheet_1.docx [file Data_Sheet_1.docx]

**Supplementary tables**

Table S1: Seepage rates – results of Kruskal-Wallis ANOVA

| Kruskal-Wallis ANOVA | |  |  |  |  |  |  |  |  |
| --- | --- | --- | --- | --- | --- | --- | --- | --- | --- |
| Deskriptive Statistik | |  |  |  |  |  |  |  |  |
| LysNr | Use | Soil texture | Fert. Treatm. | N | Min | Q1 | Median | Q3 | Max |
|  |  |  |  |  | mm | mm | mm | mm | mm |
| L70 | Grassland | LS | 50% | 286 | 0.1 | 5.5 | 17.55 | 38 | 106.5 |
| L71 | Grassland | LS | 100% | 267 | 0.1 | 5.1 | 17.5 | 34.1 | 114.7 |
| L72 | Grassland | LS | 150% | 248 | 0.1 | 5.7 | 16.85 | 32.65 | 108.1 |
| L76 | Grassland | S | 50% | 329 | 0.1 | 7.7 | 22 | 39.75 | 123.5 |
| L77 | Grassland | S | 100% | 285 | 0.1 | 8.85 | 23.4 | 41.15 | 157.8 |
| L78 | Grassland | S | 150% | 281 | 0.1 | 8.05 | 22 | 39 | 124 |
| L82 | Grassland | L | 50% | 296 | 0.1 | 6 | 20 | 35.775 | 119.1 |
| L83 | Grassland | L | 100% | 282 | 0.1 | 4.85 | 17.65 | 37.6 | 117.6 |
| L84 | Grassland | L | 150% | 290 | 0.1 | 5.15 | 18.1 | 35.5 | 116.1 |
| L88 | Grassland | Loe | 50% | 315 | 0.1 | 7.3 | 19.5 | 37.8 | 118.5 |
| L89 | Grassland | Loe | 100% | 270 | 0.1 | 6.275 | 19.45 | 36.55 | 121.5 |
| L90 | Grassland | Loe | 150% | 270 | 0.1 | 6.025 | 18.95 | 35.7 | 118.8 |
|  |  |  |  |  |  |  |  |  |  |
| Dunns Test |  |  |  |  |  |  |  |  |  |
|  | Rank difference of the mean | Z | Probability | Sig |  |  |  |  |  |
| L70 "L71" | 33.63316 | 0.40038 | 1 | 0 |  |  |  |  |  |
| L70 "L72" | 59.83308 | 0.69857 | 1 | 0 |  |  |  |  |  |
| L71 "L72" | 26.19993 | 0.30096 | 1 | 0 |  |  |  |  |  |
| L76 "L77" | -78.5658 | -0.98356 | 1 | 0 |  |  |  |  |  |
| L76 "L78" | -38.01021 | -0.47404 | 1 | 0 |  |  |  |  |  |
| L77 "L78" | 40.5556 | 0.48871 | 1 | 0 |  |  |  |  |  |
| L82 "L83" | 82.18568 | 1.00054 | 1 | 0 |  |  |  |  |  |
| L82 "L84" | 82.61113 | 1.0129 | 1 | 0 |  |  |  |  |  |
| L83 "L84" | 0.42545 | 0.00515 | 1 | 0 |  |  |  |  |  |
| L83 "L88" | -99.09483 | -1.22454 | 1 | 0 |  |  |  |  |  |
| L83 "L89" | -60.35859 | -0.71813 | 1 | 0 |  |  |  |  |  |
| L88 "L89" | 38.73624 | 0.47316 | 1 | 0 |  |  |  |  |  |
| L88 "L90" | 56.17328 | 0.68615 | 1 | 0 |  |  |  |  |  |
| L89 "L90" | 17.43704 | 0.20524 | 1 | 0 |  |  |  |  |  |
|  |  |  |  |  |  |  |  |  |  |
|  |  |  |  |  |  |  |  |  |  |
| Kruskal-Wallis ANOVA | |  |  |  |  |  |  |  |  |
| Deskriptive Statistik | |  |  |  |  |  |  |  |  |
|  | Use | Soil texture | Fert. Treatm. | N | Min | Q1 | Median | Q3 | Max |
|  |  |  |  |  | mm | mm | mm | mm | mm |
| L73 | Arable land | LS | 50% | 177 | 0.1 | 5.45 | 15.4 | 32.85 | 89.2 |
| L74 | Arable land | LS | 100% | 218 | 0.1 | 4.65 | 15.65 | 30.625 | 111.7 |
| L75 | Arable land | LS | 150% | 194 | 0.1 | 5.3 | 17.05 | 34 | 112.6 |
| L79 | Arable land | S | 50% | 244 | 0.2 | 7.85 | 21.65 | 39 | 123.2 |
| L80 | Arable land | S | 100% | 217 | 0.1 | 9.15 | 22.1 | 40.45 | 120.7 |
| L81 | Arable land | S | 150% | 220 | 0.1 | 6.9 | 21.8 | 38.65 | 120.7 |
| L85 | Arable land | L | 50% | 192 | 0.1 | 5.3 | 18.3 | 35.9 | 123.4 |
| L86 | Arable land | L | 100% | 180 | 0.2 | 5.225 | 17.95 | 33.8 | 111.1 |
| L87 | Arable land | L | 150% | 151 | 0.1 | 4.6 | 16.8 | 32.5 | 114.2 |
| L91 | Arable land | Loe | 50% | 154 | 0.2 | 5.775 | 16.7 | 35.075 | 104.2 |
| L92 | Arable land | Loe | 100% | 145 | 0.1 | 3.9 | 15.8 | 32.5 | 83.1 |
| L93 | Arable land | Loe | 150% | 101 | 0.1 | 5.45 | 14.9 | 33.25 | 88.8 |
|  |  |  |  |  |  |  |  |  |  |
| Dunns Test |  |  |  |  |  |  |  |  |  |
|  | Rank difference of the mean | Z | Probability | Sig |  |  |  |  |  |
| L73 "L74" | 23.5283 | 0.36725 | 1 | 0 |  |  |  |  |  |
| L73 "L75" | -18.56841 | -0.28212 | 1 | 0 |  |  |  |  |  |
| L74 "L75" | -42.09671 | -0.67357 | 1 | 0 |  |  |  |  |  |
| L79 "L80" | -36.41225 | -0.61628 | 1 | 0 |  |  |  |  |  |
| L79 "L81" | 26.58249 | 0.45154 | 1 | 0 |  |  |  |  |  |
| L80 "L81" | 62.99474 | 1.03983 | 1 | 0 |  |  |  |  |  |
| L85 "L86" | 54.10313 | 0.82356 | 1 | 0 |  |  |  |  |  |
| L85 "L87" | 65.67581 | 0.95357 | 1 | 0 |  |  |  |  |  |
| L86 "L87" | 11.57268 | 0.16562 | 1 | 0 |  |  |  |  |  |
| L91 "L92" | 81.23428 | 1.10867 | 1 | 0 |  |  |  |  |  |
| L91 "L93" | 46.80028 | 0.57724 | 1 | 0 |  |  |  |  |  |
| L92 "L93" | -34.434 | -0.41959 | 1 | 0 |  |  |  |  |  |
|  |  |  |  |  |  |  |  |  |  |
|  |  |  |  |  |  |  |  |  |  |
| Kruskal-Wallis ANOVA | |  |  |  |  |  |  |  |  |
| Deskriptive Statistik | |  |  |  |  |  |  |  |  |
| Seepage (annual) | | N | Min | Q1 | Median | Q3 | Max |  |  |
|  | |  | mm | mm | mm | mm | mm |  |  |
| Grass land | GL | 468 | 0 | 112.05 | 158.55 | 225.225 | 475.7 |  |  |
| Arable land | AL | 464 | 0 | 46.825 | 92.15 | 150.025 | 441 |  |  |
|  |  |  |  |  |  |  |  |  |  |
| Dunns Test |  |  |  |  |  |  |  |  |  |
|  |  | Rank difference of the mean | Z | Probability | Sig |  |  |  |  |
| Seepage | GL AL | 202.48442 | 11.48207 | <0.0001 | 1 |  |  |  |  |
|  |  |  |  |  |  |  |  |  |  |
|  |  |  |  |  |  |  |  |  |  |
| Kruskal-Wallis ANOVA | |  |  |  |  |  |  |  |  |
| Deskriptive Statistik | |  |  |  |  |  |  |  |  |
| Seepage (annual) | | N | Min | Q1 | Median | Q3 | Max |  |  |
|  | |  | mm | mm | mm | mm | mm |  |  |
| Seepage | lS | 234 | 0 | 67.825 | 108.05 | 168.425 | 413.2 |  |  |
| Seepage | S | 233 | 0 | 117.9 | 154.3 | 213.45 | 470.5 |  |  |
| Seepage | L | 234 | 0 | 74.6 | 117.05 | 186.15 | 475.7 |  |  |
| Seepage | Loe | 231 | 0 | 43.7 | 120.4 | 184.2 | 438.2 |  |  |
|  |  |  |  |  |  |  |  |  |  |
| Dunns Test |  |  |  |  |  |  |  |  |  |
|  |  | Rank difference of the mean | Z | Probability | Sig |  |  |  |  |
| Seepage | lS S | -142.3321 | -5.71327 | <0.0001 | 1 |  |  |  |  |
| Seepage | lS L | -22.37393 | -0.89906 | 1 | 0 |  |  |  |  |
| Seepage | lS Loe | 10.41281 | 0.41707 | 1 | 0 |  |  |  |  |
| Seepage | S L | 119.95817 | 4.81517 | <0.0001 | 1 |  |  |  |  |
| Seepage | S Loe | 152.74491 | 6.11148 | <0.0001 | 1 |  |  |  |  |
| Seepage | L Loe | 32.78674 | 1.31323 | 1 | 0 |  |  |  |  |

Table S2: N concentrations – results of Kruskal-Wallis ANOVA

| Kruskal-Wallis ANOVA | |  |  |  |  |  |  |  |  |
| --- | --- | --- | --- | --- | --- | --- | --- | --- | --- |
| Descriptive Statistics | |  |  |  |  |  |  |  |  |
|  | Use | Soil texture | Fert. Treatm. | N | Min | Q1 | Median | Q3 | Max |
|  |  |  |  |  | mg L-1 | mg L-1 | mg L-1 | mg L-1 | mg L-1 |
| L70 | Grassland | LS | 50% | 282 | 0.00304 | 0.77163 | 1.44424 | 3.00967 | 25.00162 |
| L71 | Grassland | LS | 100% | 263 | 0.14482 | 1.34368 | 3.7802 | 13.59784 | 113.20239 |
| L72 | Grassland | LS | 150% | 234 | 0.25351 | 2.20146 | 6.3493 | 37.23237 | 282.35814 |
| L76 | Grassland | S | 50% | 326 | 0.09131 | 1.33035 | 2.98351 | 6.90244 | 97.6456 |
| L77 | Grassland | S | 100% | 284 | 0.226 | 1.83357 | 4.7796 | 15.86685 | 243.84526 |
| L78 | Grassland | S | 150% | 280 | 0.52041 | 6.02316 | 16.1856 | 49.7529 | 408.0343 |
| L82 | Grassland | L | 50% | 289 | 0.00243 | 0.46916 | 1.0436 | 2.66657 | 464 |
| L83 | Grassland | L | 100% | 272 | 0.0452 | 1.27983 | 3.67524 | 8.24425 | 163.25814 |
| L84 | Grassland | L | 150% | 288 | 0.2328 | 2.6064 | 7.86991 | 26.1075 | 487.9842 |
| L88 | Grassland | Loe | 50% | 313 | 0.1908 | 3.07908 | 5.38671 | 10.51432 | 68.88723 |
| L89 | Grassland | Loe | 100% | 270 | 0.4588 | 4.7462 | 11.67402 | 30.23086 | 168.54015 |
| L90 | Grassland | Loe | 150% | 270 | 0.93816 | 16.25247 | 40.79867 | 69.78811 | 291.47463 |
| Dunns Test |  |  |  |  |  |  |  |  |  |
|  | Rank difference of the mean | Z | Probability | Sig |  |  |  |  |  |
| L70 "L71" | -665.56916 | -7.97749 | <0.0001 | 1 |  |  |  |  |  |
| L70 "L72" | -1055.72236 | -12.26666 | <0.0001 | 1 |  |  |  |  |  |
| L71 "L72" | -390.1532 | -4.46079 | 5.39E-04 | 1 |  |  |  |  |  |
| L76 "L77" | -343.54721 | -4.34869 | 9.04E-04 | 1 |  |  |  |  |  |
| L76 "L78" | -1007.68612 | -12.70708 | <0.0001 | 1 |  |  |  |  |  |
| L77 "L78" | -664.13891 | -8.10264 | <0.0001 | 1 |  |  |  |  |  |
| L82 "L83" | -598.44702 | -7.27858 | <0.0001 | 1 |  |  |  |  |  |
| L82 "L84" | -1122.61961 | -13.85348 | <0.0001 | 1 |  |  |  |  |  |
| L88 "L89" | -431.97494 | -5.34377 | <0.0001 | 1 |  |  |  |  |  |
| L88 "L90" | -954.12865 | -11.80309 | <0.0001 | 1 |  |  |  |  |  |
| L89 "L90" | -522.1537 | -6.23353 | <0.0001 | 1 |  |  |  |  |  |
|  |  |  |  |  |  |  |  |  |  |
|  |  |  |  |  |  |  |  |  |  |
| Kruskal-Wallis ANOVA | |  |  |  |  |  |  |  |  |
| Descriptive Statistics | |  |  |  |  |  |  |  |  |
|  | Use | Soil texture | Fert. Treatm. | N | Min | Q1 | Median | Q3 | Max |
|  |  |  |  |  | mg L-1 | mg L-1 | mg L-1 | mg L-1 | mg L-1 |
| L73 | Arable | LS | 50% | 174 | 0.1856 | 13.61506 | 23.99566 | 50.56151 | 147.11605 |
| L74 | Arable | LS | 100% | 215 | 2.23232 | 12.999 | 27.22091 | 44.69115 | 304.62822 |
| L75 | Arable | LS | 150% | 193 | 1.86411 | 16.3953 | 31.61768 | 55.7419 | 370.38198 |
| L79 | Arable | S | 50% | 244 | 0.15942 | 9.50863 | 17.5779 | 26.68462 | 150.57215 |
| L80 | Arable | S | 100% | 216 | 0.02304 | 11.55181 | 20.71454 | 33.94243 | 248.60026 |
| L81 | Arable | S | 150% | 217 | 0.17624 | 9.47996 | 20.34334 | 38.68966 | 266.57409 |
| L85 | Arable | L | 50% | 187 | 1.14574 | 7.05265 | 16.3627 | 33.56282 | 438 |
| L86 | Arable | L | 100% | 178 | 0.19384 | 6.71395 | 16.49626 | 33.31554 | 176.19674 |
| L87 | Arable | L | 150% | 148 | 0.9108 | 11.14633 | 22.45726 | 41.83164 | 427 |
| L91 | Arable | Loe | 50% | 151 | 0.24373 | 7.4354 | 19.67666 | 32.56832 | 158.47211 |
| L92 | Arable | Loe | 100% | 141 | 0.3902 | 13.69371 | 25.49688 | 52.69368 | 143.89602 |
| L93 | Arable | Loe | 150% | 100 | 1.7644 | 18.41681 | 36.45636 | 57.10725 | 141.86192 |
| Dunns Test |  |  |  |  |  |  |  |  |  |
|  | Rank difference of the mean | Z | Probability | Sig |  |  |  |  |  |
| L73 "L74" | -7.20012 | -0.113 | 1 | 0 |  |  |  |  |  |
| L73 "L75" | -107.68836 | -1.64863 | 1 | 0 |  |  |  |  |  |
| L74 "L75" | -100.48824 | -1.62187 | 1 | 0 |  |  |  |  |  |
| L79 "L80" | -101.55612 | -1.73973 | 1 | 0 |  |  |  |  |  |
| L79 "L81" | -117.74561 | -2.01954 | 1 | 0 |  |  |  |  |  |
| L80 "L81" | -16.18948 | -0.26957 | 1 | 0 |  |  |  |  |  |
| L85 "L86" | -7.89034 | -0.12059 | 1 | 0 |  |  |  |  |  |
| L85 "L87" | -187.71004 | -2.73055 | 0.41731 | 0 |  |  |  |  |  |
| L86 "L87" | -179.81969 | -2.58704 | 0.63892 | 0 |  |  |  |  |  |
| L91 "L92" | -239.02475 | -3.2665 | 0.07186 | 0 |  |  |  |  |  |
| L91 "L93" | -354.92099 | -4.40572 | 6.96E-04 | 1 |  |  |  |  |  |
| L92 "L93" | -115.89624 | -1.41874 | 1 | 0 |  |  |  |  |  |

Table S3: N loads – results of Kruskal-Wallis ANOVA

| Kruskal-Wallis ANOVA (12/01/2024 16:05:28) | | | |  |  |  |  |  |  |
| --- | --- | --- | --- | --- | --- | --- | --- | --- | --- |
| Descriptive Statistics | |  |  |  |  |  |  |  |  |
|  | Use | Soil texture | Fert. Treatm. | N | Min | Q1 | Median | Q3 | Max |
|  |  |  |  |  | kg ha-1 | kg ha-1 | kg ha-1 | kg ha-1 | kg ha-1 |
| Lys70 | Grassland | LS | 50% | 39 | 0.00984 | 1.65229 | 2.95943 | 7.04815 | 14.52764 |
| Lys71 | Grassland | LS | 100% | 39 | 0.00654 | 2.8995 | 8.26343 | 21.35423 | 167.45715 |
| Lys72 | Grassland | LS | 150% | 39 | 0.00483 | 3.57686 | 12.87345 | 48.31317 | 315.79353 |
| Lys76 | Grassland | S | 50% | 39 | 1.4157 | 5.29837 | 9.31364 | 22.38191 | 43.87236 |
| Lys77 | Grassland | S | 100% | 39 | 1.60334 | 5.94105 | 18.60664 | 39.41646 | 259.83598 |
| Lys78 | Grassland | S | 150% | 39 | 0.50332 | 14.53413 | 49.36781 | 128.47049 | 475.6928 |
| Lys82 | Grassland | L | 50% | 38 | 0.21405 | 1.19601 | 2.46208 | 5.05145 | 50.36177 |
| Lys83 | Grassland | L | 100% | 38 | 0.17435 | 3.57269 | 8.04454 | 19.85628 | 82.27157 |
| Lys84 | Grassland | L | 150% | 38 | 0.36079 | 10.77361 | 25.02729 | 43.57725 | 407.59395 |
| Lys88 | Grassland | Loe | 50% | 38 | 0.68165 | 5.82759 | 10.38771 | 28.97558 | 58.10116 |
| Lys89 | Grassland | Loe | 100% | 38 | 0 | 7.10165 | 26.48763 | 47.95946 | 233.20866 |
| Lys90 | Grassland | Loe | 150% | 37 | 1.55175 | 16.80325 | 68.11149 | 120.71119 | 407.19045 |
| Dunns Test |  |  |  |  |  |  |  |  |  |
|  | Rank difference of the mean | Z | Probability | Sig |  |  |  |  |  |
| Lys70 "Lys71" | -94.05128 | -3.11746 | 0.12039 | 0 |  |  |  |  |  |
| Lys70 "Lys72" | -136.97436 | -4.54021 | 3.71E-04 | 1 |  |  |  |  |  |
| Lys71 "Lys72" | -42.92308 | -1.42275 | 1 | 0 |  |  |  |  |  |
| Lys76 "Lys77" | -41.74359 | -1.38365 | 1 | 0 |  |  |  |  |  |
| Lys76 "Lys78" | -115.23077 | -3.81949 | 0.00883 | 1 |  |  |  |  |  |
| Lys77 "Lys78" | -73.48718 | -2.43584 | 0.98059 | 0 |  |  |  |  |  |
| Lys82 "Lys83" | -86.84211 | -2.84136 | 0.29648 | 0 |  |  |  |  |  |
| Lys82 "Lys84" | -175.97368 | -5.75763 | <0.0001 | 1 |  |  |  |  |  |
| Lys83 "Lys84" | -89.13158 | -2.91627 | 0.2338 | 0 |  |  |  |  |  |
| Lys88 "Lys89" | -44.34211 | -1.45082 | 1 | 0 |  |  |  |  |  |
| Lys88 "Lys90" | -111.29659 | -3.61712 | 0.01966 | 1 |  |  |  |  |  |
| Lys89 "Lys90" | -66.95448 | -2.17601 | 1 | 0 |  |  |  |  |  |
|  |  |  |  |  |  |  |  |  |  |
|  |  |  |  |  |  |  |  |  |  |
|  |  |  |  |  |  |  |  |  |  |
| Kruskal-Wallis ANOVA | | | |  |  |  |  |  |  |
| Descriptive Statistics | |  |  |  |  |  |  |  |  |
|  | Use | Soil texture | Fert. Treatm. | N | Min | Q1 | Median | Q3 | Max |
|  |  |  |  |  | kg ha-1 | kg ha-1 | kg ha-1 | kg ha-1 | kg ha-1 |
| Lys73 | Arable | LS | 50% | 37 | 0.96888 | 12.35227 | 16.94173 | 46.7724 | 180.24882 |
| Lys74 | Arable | LS | 100% | 38 | 0.12341 | 13.24862 | 28.3387 | 43.48365 | 339.15874 |
| Lys75 | Arable | LS | 150% | 38 | 0.05807 | 13.47967 | 30.66502 | 53.40339 | 394.49884 |
| Lys79 | Arable | S | 50% | 38 | 3.64169 | 16.35229 | 26.84416 | 60.16339 | 208.72524 |
| Lys80 | Arable | S | 100% | 38 | 0 | 14.98073 | 35.37115 | 58.99729 | 300.84006 |
| Lys81 | Arable | S | 150% | 37 | 0.41392 | 18.48644 | 36.6158 | 58.43469 | 343.00505 |
| Lys85 | Arable | L | 50% | 37 | 1.38682 | 7.64003 | 13.0558 | 39.40767 | 251.67734 |
| Lys86 | Arable | L | 100% | 38 | 0.05876 | 5.65942 | 13.16435 | 22.80121 | 169.53897 |
| Lys87 | Arable | L | 150% | 37 | 0 | 6.08485 | 13.00487 | 32.33304 | 197.06769 |
| Lys91 | Arable | Loe | 50% | 35 | 0.31828 | 4.2469 | 12.09121 | 27.66598 | 176.04894 |
| Lys92 | Arable | Loe | 100% | 35 | 0.08885 | 5.14435 | 15.67501 | 33.35203 | 212.70886 |
| Lys93 | Arable | Loe | 150% | 30 | 0.15627 | 5.77321 | 21.03471 | 40.36475 | 160.64533 |
| Dunns Test |  |  |  |  |  |  |  |  |  |
|  | Rank difference of the mean | Z | Probability | Sig |  |  |  |  |  |
| Lys73 "Lys74" | -17.5 | -0.59858 | 1 | 0 |  |  |  |  |  |
| Lys73 "Lys75" | -27 | -0.92352 | 1 | 0 |  |  |  |  |  |
| Lys74 "Lys75" | -9.5 | -0.32713 | 1 | 0 |  |  |  |  |  |
| Lys79 "Lys80" | -9.98684 | -0.3439 | 1 | 0 |  |  |  |  |  |
| Lys79 "Lys81" | -14.91963 | -0.51032 | 1 | 0 |  |  |  |  |  |
| Lys80 "Lys81" | -4.93279 | -0.16872 | 1 | 0 |  |  |  |  |  |
| Lys85 "Lys86" | 19.61024 | 0.67076 | 1 | 0 |  |  |  |  |  |
| Lys85 "Lys87" | 5.58108 | 0.18964 | 1 | 0 |  |  |  |  |  |
| Lys86 "Lys87" | -14.02916 | -0.47986 | 1 | 0 |  |  |  |  |  |
| Lys91 "Lys92" | -23.02857 | -0.76104 | 1 | 0 |  |  |  |  |  |
| Lys91 "Lys93" | -33.94286 | -1.07772 | 1 | 0 |  |  |  |  |  |
| Lys92 "Lys93" | -10.91429 | -0.34654 | 1 | 0 |  |  |  |  |  |
|  |  |  |  |  |  |  |  |  |  |
|  |  |  |  |  |  |  |  |  |  |
| Kruskal-Wallis ANOVA | |  |  |  |  |  |  |  |  |
| Descriptive Statistics | |  |  |  |  |  |  |  |  |
|  |  | N | Min | Q1 | Median | Q3 | Max |  |  |
|  |  |  | kg ha-1 | kg ha-1 | kg ha-1 | kg ha-1 | kg ha-1 |  |  |
| NLoad | GL | 461 | 0 | 4.0097 | 12.1418 | 37.71948 | 475.6928 |  |  |
| NLoad | AL | 438 | 0 | 8.48487 | 20.47266 | 42.45313 | 394.49884 |  |  |
| Dunns Test |  |  |  |  |  |  |  |  |  |
|  |  | Rank difference of the mean | Z | Probability | Sig |  |  |  |  |
| NLoad | GL AL | -81.61516 | -4.71051 | <0.0001 | 1 |  |  |  |  |

Table S4: Dry matter yields – results of Kruskal-Wallis ANOVA

|  |  |  |  |  |  |  |  |  |  |
| --- | --- | --- | --- | --- | --- | --- | --- | --- | --- |
| Kruskal-Wallis ANOVA | |  |  |  |  |  |  |  |  |
| Descriptive Statistics | |  |  |  |  |  |  |  |  |
|  | Use | Soil texture | Fert. Treatm. | N | Min | Q1 | Median | Q3 | Max |
|  |  |  |  |  | kg ha-1 | kg ha-1 | kg ha-1 | kg ha-1 | kg ha-1 |
| Lys70 | Grassland | LS | 50% | 38 | 2773.52 | 6629.5525 | 7743.52 | 10091.6725 | 18618.83 |
| Lys71 | Grassland | LS | 100% | 38 | 4502.655 | 8497.61188 | 10129.04 | 13169.57 | 15669.63 |
| Lys72 | Grassland | LS | 150% | 38 | 4361.41 | 9507.75688 | 12063.89 | 14866.4496 | 19635.12 |
| Lys76 | Grassland | S | 50% | 38 | 2462.6 | 5849.60275 | 8138.87 | 9466.5825 | 15639.78 |
| Lys77 | Grassland | S | 100% | 38 | 3891.88 | 6415.3675 | 9807.705 | 12034.4208 | 14455.8 |
| Lys78 | Grassland | S | 150% | 38 | 3521.72 | 8150.815 | 11514.94 | 13535.112 | 18406.46 |
| Lys82 | Grassland | L | 50% | 38 | 3262.87 | 7461.995 | 8431.89 | 10416.24 | 21856.64 |
| Lys83 | Grassland | L | 100% | 38 | 3986.3725 | 8743.8775 | 10866.91 | 13054.0825 | 15550.07 |
| Lys84 | Grassland | L | 150% | 38 | 4675.23 | 9943.08 | 12755.245 | 14985.7275 | 19228.22 |
| Lys88 | Grassland | Loe | 50% | 38 | 2426.47 | 6290.4225 | 8070.5725 | 8852.43667 | 15605.38 |
| Lys89 | Grassland | Loe | 100% | 38 | 3801.555 | 8768.32875 | 10471.04 | 12081.94 | 14207.72 |
| Lys90 | Grassland | Loe | 150% | 38 | 5559.705 | 10417.535 | 12513.11 | 13981.0513 | 17155.08 |
|  |  |  |  |  |  |  |  |  |  |
| Dunns Test |  |  |  |  |  |  |  |  |  |
|  | Rank difference of the mean | Z | Probability | Sig |  |  |  |  |  |
| Lys70 "Lys71" | -89.48684 | -2.95996 | 0.20307 | 0 |  |  |  |  |  |
| Lys70 "Lys72" | -144.65789 | -4.78486 | 1.13E-04 | 1 |  |  |  |  |  |
| Lys71 "Lys72" | -55.17105 | -1.8249 | 1 | 0 |  |  |  |  |  |
| Lys76 "Lys 77" | -57.22368 | -1.89279 | 1 | 0 |  |  |  |  |  |
| Lys76 "Lys78" | -122.39474 | -4.04846 | 0.0034 | 1 |  |  |  |  |  |
| Lys77 "Lys78" | -65.17105 | -2.15567 | 1 | 0 |  |  |  |  |  |
| Lys82 "Lys83" | -89.76316 | -2.9691 | 0.19712 | 0 |  |  |  |  |  |
| Lys82 "Lys84" | -141.89474 | -4.69346 | 1.77E-04 | 1 |  |  |  |  |  |
| Lys83 "Lys84" | -52.13158 | -1.72436 | 1 | 0 |  |  |  |  |  |
| Lys88 "Lys89" | -103.21053 | -3.4139 | 0.04227 | 1 |  |  |  |  |  |
| Lys88 "Lys90" | -171.89474 | -5.68577 | <0.0001 | 1 |  |  |  |  |  |
| Lys89 "Lys90" | -68.68421 | -2.27187 | 1 | 0 |  |  |  |  |  |
|  |  |  |  |  |  |  |  |  |  |
|  |  |  |  |  |  |  |  |  |  |
| Kruskal-Wallis ANOVA | |  |  |  |  |  |  |  |  |
| Descriptive Statistics | |  |  |  |  |  |  |  |  |
|  | Use | Soil texture | Fert. Treatm. | N | Min | Q1 | Median | Q3 | Max |
|  |  |  |  |  | kg ha-1 | kg ha-1 | kg ha-1 | kg ha-1 | kg ha-1 |
| Lys 73 | Arable | LS | 50% | 38 | 3636.42 | 8761.09 | 11469.06 | 15112.5275 | 25640.64 |
| Lys 74 | Arable | LS | 100% | 38 | 3444.84 | 7945.625 | 12338.015 | 15831.983 | 26522.72 |
| Lys 75 | Arable | LS | 150% | 38 | 3056.54 | 9257.88634 | 13775.3088 | 16357.004 | 30947.48 |
| Lys 79 | Arable | S | 50% | 38 | 2186.36 | 6117.19 | 8579.63 | 13259.7473 | 21625.14 |
| Lys 80 | Arable | S | 100% | 38 | 2831.92 | 7646.6625 | 12087.76 | 14913.309 | 27382.48 |
| Lys 81 | Arable | S | 150% | 38 | 2687.84 | 8908.2825 | 12070.425 | 15623.186 | 30714.22 |
| Lys 85 | Arable | L | 50% | 38 | 2029.75 | 7489.56625 | 10080.913 | 15835.705 | 23152.72 |
| Lys 86 | Arable | L | 100% | 38 | 2591.6 | 9039.21 | 11621.667 | 16975.8075 | 23554.4 |
| Lys 87 | Arable | L | 150% | 38 | 3178.16 | 10200.915 | 12933.04 | 17285.295 | 28077.8 |
| Lys 91 | Arable | Loe | 50% | 38 | 2186.36 | 7529.265 | 10265.1325 | 15808.195 | 21728.32 |
| Lys 92 | Arable | Loe | 100% | 38 | 3436.18 | 9418.37 | 12564.53 | 17300.097 | 28761.86 |
| Lys 93 | Arable | Loe | 150% | 38 | 4847.12 | 10972.3255 | 13184.04 | 18436.7503 | 29854.03 |
| Dunns Test |  |  |  |  |  |  |  |  |  |
|  | Rank difference of the mean | Z | Probability | Sig |  |  |  |  |  |
| Lys73 "Lys74" | -4.26316 | -0.14101 | 1 | 0 |  |  |  |  |  |
| Lys73 "Lys75" | -32.42105 | -1.07239 | 1 | 0 |  |  |  |  |  |
| Lys74 "Lys75" | -28.15789 | -0.93138 | 1 | 0 |  |  |  |  |  |
| Lys79 "Lys80" | -58.38158 | -1.93109 | 1 | 0 |  |  |  |  |  |
| Lys79 "Lys81" | -76.67105 | -2.53605 | 0.73992 | 0 |  |  |  |  |  |
| Lys80 "Lys81" | -18.28947 | -0.60496 | 1 | 0 |  |  |  |  |  |
| Lys85 "Lys86" | -36.07895 | -1.19339 | 1 | 0 |  |  |  |  |  |
| Lys85 "Lys87" | -67.76316 | -2.24141 | 1 | 0 |  |  |  |  |  |
| Lys86 "Lys87" | -31.68421 | -1.04802 | 1 | 0 |  |  |  |  |  |
| Lys91 "Lys92" | -57.64474 | -1.90672 | 1 | 0 |  |  |  |  |  |
| Lys91 "Lys93" | -83.14474 | -2.75018 | 0.39311 | 0 |  |  |  |  |  |
| Lys92 "Lys93" | -25.5 | -0.84347 | 1 | 0 |  |  |  |  |  |
|  |  |  |  |  |  |  |  |  |  |
|  |  |  |  |  |  |  |  |  |  |
| Kruskal-Wallis ANOVA | |  |  |  |  |  |  |  |  |
| Descriptive Statistics | |  |  |  |  |  |  |  |  |
|  | Soil type | N | Min | Q1 | Median | Q3 | Max |  |  |
|  |  |  | kg ha-1 | kg ha-1 | kg ha-1 | kg ha-1 | kg ha-1 |  |  |
| DM Yield | LS | 228 | 2773.52 | 8007.94563 | 10828.25 | 14323.3363 | 30947.48 |  |  |
| DM Yield | S | 228 | 2186.36 | 6945.5875 | 9953.5 | 13088.0863 | 30714.22 |  |  |
| DM Yield | L | 228 | 2029.75 | 8489.045 | 11073.93 | 14038.5027 | 28077.8 |  |  |
| DM Yield | Loe | 228 | 2186.36 | 8301.035 | 10884.775 | 13774.435 | 29854.03 |  |  |
|  |  |  |  |  |  |  |  |  |  |
| Dunns Test |  |  |  |  |  |  |  |  |  |
|  |  | Rank difference of the mean | Z | Probability | Sig |  |  |  |  |
| DM Yield | LS S | 62.07675 | 2.51617 | 0.07118 | 0 |  |  |  |  |
| DM Yield | LS L | -13.99123 | -0.56711 | 1 | 0 |  |  |  |  |
| DM Yield | LS Loe | 2.38816 | 0.0968 | 1 | 0 |  |  |  |  |
| DM Yield | S L | -76.06798 | -3.08327 | 0.01228 | 1 |  |  |  |  |
| DM Yield | S Loe | -59.6886 | -2.41937 | 0.09329 | 0 |  |  |  |  |
| DM Yield | L Loe | 16.37939 | 0.66391 | 1 | 0 |  |  |  |  |
|  |  |  |  |  |  |  |  |  |  |
|  |  |  |  |  |  |  |  |  |  |
| Kruskal-Wallis ANOVA | |  |  |  |  |  |  |  |  |
| Deskriptive Statistik | |  |  |  |  |  |  |  |  |
|  | Land use | N | Min | Q1 | Median | Q3 | Max |  |  |
|  |  |  | kg ha-1 | kg ha-1 | kg ha-1 | kg ha-1 | kg ha-1 |  |  |
| DM Yield | GL | 456 | 2426.47 | 7734.14 | 9955.85 | 12478.815 | 21856.64 |  |  |
| DM Yield | AL | 456 | 2029.75 | 8475.5975 | 11889.625 | 15889.5618 | 30947.48 |  |  |
|  |  |  |  |  |  |  |  |  |  |
| Dunns Test |  |  |  |  |  |  |  |  |  |
|  |  | Rank difference of the mean | Z | Probability | Sig |  |  |  |  |
| DM Yield | GL AL | -113.54167 | -6.50849 | <0.0001 | 1 |  |  |  |  |
|  |  |  |  |  |  |  |  |  |  |
|  |  |  |  |  |  |  |  |  |  |
| Kruskal-Wallis ANOVA | |  |  |  |  |  |  |  |  |
| Descriptive Statistics | |  |  |  |  |  |  |  |  |
|  | Fert. Treat. | N | Min | Q1 | Median | Q3 | Max |  |  |
|  |  |  | kg ha-1 | kg ha-1 | kg ha-1 | kg ha-1 | kg ha-1 |  |  |
| DM Yield | 50Percent | 304 | 2029.75 | 7164.5465 | 8772.43 | 11233.95 | 25640.64 |  |  |
| DM Yield | 100Percent | 304 | 2591.6 | 8475.5975 | 10857.605 | 13697.8275 | 28761.86 |  |  |
| DM Yield | 150Percent | 304 | 2687.84 | 9640.99 | 12436.095 | 15291.055 | 30947.48 |  |  |
|  |  |  |  |  |  |  |  |  |  |
| Dunns Test |  |  |  |  |  |  |  |  |  |
|  |  | Rank difference of the mean | Z | Probability | Sig |  |  |  |  |
| DM Yield | 50Percent 100Percent | -114.71875 | -5.36925 | <0.0001 | 1 |  |  |  |  |
| DM Yield | 50Percent 150Percent | -196.73355 | -9.20785 | <0.0001 | 1 |  |  |  |  |
| DM Yield | 100Percent 150Percent | -82.0148 | -3.83859 | 3.71E-04 | 1 |  |  |  |  |

Table S5: N Uptake – results of Kruskal-Wallis ANOVA

| Kruskal-Wallis ANOVA | |  |  |  |  |  |  |  |  |
| --- | --- | --- | --- | --- | --- | --- | --- | --- | --- |
| Descriptive Statistics | |  |  |  |  |  |  |  |  |
|  | Use | Soil texture | Fert. Treatm. | N | Min | Q1 | Median | Q3 | Max |
|  |  |  |  |  | kg ha-1 | kg ha-1 | kg ha-1 | kg ha-1 | kg ha-1 |
| Lys70 | Grassland | LS | 50% | 29 | 55.1 | 119.76408 | 168.418 | 185.2918 | 344.5032 |
| Lys71 | Grassland | LS | 100% | 35 | 104.5 | 199.2438 | 258.58 | 292.9015 | 378.2954 |
| Lys72 | Grassland | LS | 150% | 29 | 108 | 283.6744 | 350.9672 | 413.62935 | 612.612 |
| Lys76 | Grassland | S | 50% | 29 | 44.01381 | 114.05043 | 177.086 | 193.8695 | 378.488 |
| Lys77 | Grassland | S | 100% | 29 | 91.96832 | 151.44633 | 249.1356 | 303.42359 | 382.236 |
| Lys78 | Grassland | S | 150% | 29 | 90.5154 | 216.05429 | 329.4976 | 398.06371 | 563.2236 |
| Lys82 | Grassland | L | 50% | 29 | 54.3474 | 120.76382 | 167.0955 | 182.427 | 267.531 |
| Lys83 | Grassland | L | 100% | 29 | 54.3474 | 120.76382 | 167.0955 | 182.427 | 267.531 |
| Lys84 | Grassland | L | 150% | 29 | 116.875 | 247.28261 | 332.2524 | 410.9486 | 485.057 |
| Lys88 | Grassland | Loe | 50% | 28 | 45.41472 | 108.25825 | 170.84855 | 199.95128 | 333.9684 |
| Lys89 | Grassland | Loe | 100% | 29 | 89.80324 | 190.13845 | 265.6884 | 308.51145 | 370.9992 |
| Lys90 | Grassland | Loe | 150% | 29 | 140.15616 | 284.9535 | 333.6 | 388.5709 | 424.26428 |
|  |  |  |  |  |  |  |  |  |  |
| Dunns Test |  |  |  |  |  |  |  |  |  |
|  | Rank difference of the mean | Z | Probability | Sig |  |  |  |  |  |
| Lys70 "Lys71" | -103.25123 | -4.0294 | 0.00369 | 1 |  |  |  |  |  |
| Lys70 "Lys72" | -166.24138 | -6.20334 | <0.0001 | 1 |  |  |  |  |  |
| Lys71 "Lys72" | -62.99015 | -2.45821 | 0.92158 | 0 |  |  |  |  |  |
| Lys76 "Lys77" | -71.37931 | -2.66354 | 0.51034 | 0 |  |  |  |  |  |
| Lys76 "Lys78" | -137.68966 | -5.13793 | <0.0001 | 1 |  |  |  |  |  |
| Lys77 "Lys78" | -66.31034 | -2.47439 | 0.88087 | 0 |  |  |  |  |  |
| Lys82 "Lys83" | 0 | 0 | 1 | 0 |  |  |  |  |  |
| Lys82 "Lys84" | -160.12069 | -5.97495 | <0.0001 | 1 |  |  |  |  |  |
| Lys83 "Lys84" | -160.12069 | -5.97495 | <0.0001 | 1 |  |  |  |  |  |
| Lys88 "Lys89" | -90.32759 | -3.3409 | 0.05511 | 0 |  |  |  |  |  |
| Lys88 "Lys90" | -154.74138 | -5.72334 | <0.0001 | 1 |  |  |  |  |  |
| Lys 89 "Lys90" | -64.41379 | -2.40362 | 1 | 0 |  |  |  |  |  |
|  |  |  |  |  |  |  |  |  |  |
|  |  |  |  |  |  |  |  |  |  |
| Kruskal-Wallis ANOVA | |  |  |  |  |  |  |  |  |
| Descriptive Statistics | |  |  |  |  |  |  |  |  |
|  | Use | Soil texture | Fert. Treatm. | N | Min | Q1 | Median | Q3 | Max |
|  |  |  |  |  | kg ha-1 | kg ha-1 | kg ha-1 | kg ha-1 | kg ha-1 |
| Lys73 | Arable | LS | 50% | 29 | 57.70332 | 97.49763 | 138.6732 | 196.54371 | 716.9976 |
| Lys74 | Arable | LS | 100% | 29 | 46.26635 | 105.44003 | 162.7875 | 231.81204 | 713.6943 |
| Lys75 | Arable | LS | 150% | 29 | 40.73648 | 130.2966 | 179.2234 | 275.0909 | 663.102 |
| Lys79 | Arable | S | 50% | 28 | 35.95124 | 60.81158 | 98.0654 | 137.13098 | 291.826 |
| Lys80 | Arable | S | 100% | 28 | 40.85186 | 79.96265 | 160.5425 | 236.9427 | 729.2682 |
| Lys81 | Arable | S | 150% | 29 | 39.05664 | 98.16562 | 167.19919 | 263.09171 | 587.613 |
| Lys85 | Arable | L | 50% | 29 | 46.90517 | 95.69118 | 138.5452 | 181.29093 | 681.9591 |
| Lys86 | Arable | L | 100% | 29 | 38.89091 | 123.39125 | 155.4957 | 217.46231 | 711.511 |
| Lys87 | Arable | L | 150% | 29 | 43.34792 | 160.95567 | 184.64128 | 262.05596 | 565.8776 |
| Lys91 | Arable | Loe | 50% | 29 | 35.96628 | 81.80897 | 110.2912 | 186.4575 | 524.4362 |
| Lys92 | Arable | Loe | 100% | 29 | 56.66294 | 125.17725 | 161.93274 | 241.99199 | 619.4023 |
| Lys93 | Arable | Loe | 150% | 29 | 50.9 | 141.34433 | 204.6248 | 310.0922 | 643.28 |
|  |  |  |  |  |  |  |  |  |  |
| Dunns Test |  |  |  |  |  |  |  |  |  |
|  | Rank difference of the mean | Z | Probability | Sig |  |  |  |  |  |
| Lys73 "Lys74" | -18.31034 | -0.69706 | 1 | 0 |  |  |  |  |  |
| Lys73 "Lys75" | -45.13793 | -1.71836 | 1 | 0 |  |  |  |  |  |
| Lys74 "Lys75" | -26.82759 | -1.0213 | 1 | 0 |  |  |  |  |  |
| Lys79 "Lys80" | -68.03571 | -2.54501 | 0.72122 | 0 |  |  |  |  |  |
| Lys79 "Lys81" | -91.0936 | -3.43729 | 0.03878 | 1 |  |  |  |  |  |
| Lys80 "Lys81" | -23.05788 | -0.87006 | 1 | 0 |  |  |  |  |  |
| Lys85 "Lys86" | -31.17241 | -1.1867 | 1 | 0 |  |  |  |  |  |
| Lys85 "Lys87" | -62.7931 | -2.39047 | 1 | 0 |  |  |  |  |  |
| Lys86 "Lys87" | -31.62069 | -1.20377 | 1 | 0 |  |  |  |  |  |
| Lys91 "Lys92" | -53.55172 | -2.03866 | 1 | 0 |  |  |  |  |  |
| Lys91 "Lys93" | -77.48276 | -2.94969 | 0.20994 | 0 |  |  |  |  |  |
| Lys92 "Lys93" | -23.93103 | -0.91103 | 1 | 0 |  |  |  |  |  |
|  |  |  |  |  |  |  |  |  |  |
|  |  |  |  |  |  |  |  |  |  |
| Kruskal-Wallis ANOVA | |  |  |  |  |  |  |  |  |
| Descriptive Statistics | |  |  |  |  |  |  |  |  |
|  |  | N | Min | Q1 | Median | Q3 | Max |  |  |
|  |  |  | kg ha-1 | kg ha-1 | kg ha-1 | kg ha-1 | kg ha-1 |  |  |
| N Uptake | 50Percent | 236 | 0 | 94.89602 | 146.66995 | 186.43485 | 716.9976 |  |  |
| N Uptake | 100Percent | 242 | 0 | 137.34276 | 203.21873 | 280.5524 | 729.2682 |  |  |
| N Uptake | 150Percent | 236 | 0 | 167.51139 | 257.19895 | 357.21735 | 663.102 |  |  |
|  |  |  |  |  |  |  |  |  |  |
| Dunns Test |  |  |  |  |  |  |  |  |  |
|  |  | Rank difference of the mean | Z | Probability | Sig |  |  |  |  |
| N Uptake | 50Percent 100Percent | -126.78854 | -6.71924 | <0.0001 | 1 |  |  |  |  |
| N Uptake | 50Percent 150Percent | -202.44492 | -10.66199 | <0.0001 | 1 |  |  |  |  |
| N Uptake | 100Percent 150Percent | -75.65638 | -4.00946 | 1.83E-04 | 1 |  |  |  |  |
|  |  |  |  |  |  |  |  |  |  |
|  |  |  |  |  |  |  |  |  |  |
| Kruskal-Wallis ANOVA | |  |  |  |  |  |  |  |  |
| Descriptive Statistics | |  |  |  |  |  |  |  |  |
|  |  | N | Min | Q1 | Median | Q3 | Max |  |  |
|  |  |  | kg ha-1 | kg ha-1 | kg ha-1 | kg ha-1 | kg ha-1 |  |  |
| N Uptake | GL | 354 | 0 | 167.09214 | 234.2675 | 317.06225 | 612.612 |  |  |
| N Uptake | AL | 360 | 0 | 95.94282 | 156.4665 | 224.13363 | 729.2682 |  |  |
| Dunns Test |  |  |  |  |  |  |  |  |  |
|  |  | Rank difference of the mean | Z | Probability | Sig |  |  |  |  |
| N Uptake | GL AL | 138.60363 | 8.97778 | <0.0001 | 1 |  |  |  |  |
|  |  |  |  |  |  |  |  |  |  |
|  |  |  |  |  |  |  |  |  |  |
| Kruskal-Wallis ANOVA | |  |  |  |  |  |  |  |  |
| Descriptive Statistics | |  |  |  |  |  |  |  |  |
|  |  | N | Min | Q1 | Median | Q3 | Max |  |  |
|  |  |  | kg ha-1 | kg ha-1 | kg ha-1 | kg ha-1 | kg ha-1 |  |  |
| N Uptake | LS | 183 | 0 | 129.3765 | 193.8222 | 289.5 | 716.9976 |  |  |
| N Uptake | S | 177 | 0 | 100.77235 | 177.086 | 255.27445 | 729.2682 |  |  |
| N Uptake | L | 177 | 0 | 139.38684 | 183.1 | 278.1766 | 711.511 |  |  |
| N Uptake | Loe | 177 | 0 | 124.72974 | 194.5164 | 297.67409 | 643.28 |  |  |
| Dunns Test |  |  |  |  |  |  |  |  |  |
|  |  | Rank difference of the mean | Z | Probability | Sig |  |  |  |  |
| N Uptake | LS S | 47.50032 | 2.18448 | 0.17356 | 0 |  |  |  |  |
| N Uptake | LS L | 7.68112 | 0.35324 | 1 | 0 |  |  |  |  |
| N Uptake | LS Loe | 7.64157 | 0.35143 | 1 | 0 |  |  |  |  |
| N Uptake | S L | -39.81921 | -1.81616 | 0.41607 | 0 |  |  |  |  |
| N Uptake | S Loe | -39.85876 | -1.81797 | 0.41442 | 0 |  |  |  |  |
| N Uptake | L Loe | -0.03955 | -0.0018 | 1 | 0 |  |  |  |  |

Table S6 N Budget

| N Budget |  |  |  |  |  |  |  |  |  |
| --- | --- | --- | --- | --- | --- | --- | --- | --- | --- |
|  |  |  |  |  |  |  |  |  |  |
| Lysimeter | Use | Fertilization Level | Soil texture | AtmosDepo | Legume N-Fixierung | N Fertilization | N Uptake | N Leaching | N Budget |
|  |  | % |  | kg ha-1 | kg ha-1 | kg ha-1 | kg ha-1 | kg ha-1 | kg ha-1 |
| 70 | GL | 50 | LS | 8.26 |  | 140 | 168.42 | 2.95943 | -23.12 |
| 71 | GL | 100 | LS | 8.26 |  | 280 | 258.58 | 8.26343 | 21.42 |
| 72 | GL | 150 | LS | 8.26 |  | 420 | 350.97 | 12.87345 | 64.42 |
| 76 | GL | 50 | S | 8.26 |  | 140 | 177.09 | 9.31364 | -38.14 |
| 77 | GL | 100 | S | 8.26 |  | 280 | 249.14 | 18.60664 | 20.52 |
| 78 | GL | 150 | S | 8.26 |  | 420 | 329.50 | 49.36781 | 49.39 |
| 82 | GL | 50 | L | 8.26 |  | 140 | 167.10 | 2.46208 | -21.30 |
| 83 | GL | 100 | L | 8.26 |  | 280 | 167.10 | 8.04454 | 113.12 |
| 84 | GL | 150 | L | 8.26 |  | 420 | 332.25 | 25.02729 | 70.98 |
| 88 | GL | 50 | Loe | 8.26 |  | 140 | 170.85 | 10.38771 | -32.98 |
| 89 | GL | 100 | Loe | 8.26 |  | 280 | 265.69 | 26.48763 | -3.92 |
| 90 | GL | 150 | Loe | 8.26 |  | 420 | 333.60 | 68.11149 | 26.55 |
| 73 | AL | 50 | LS | 8.26 | 57.5 | 48.75 | 138.67 | 16.94173 | -41.10 |
| 74 | AL | 100 | LS | 8.26 | 57.5 | 97.5 | 162.79 | 28.3387 | -27.87 |
| 75 | AL | 150 | LS | 8.26 | 57.5 | 146.25 | 179.22 | 30.66502 | 2.12 |
| 79 | AL | 50 | S | 8.26 | 57.5 | 48.75 | 98.07 | 26.84416 | -10.40 |
| 80 | AL | 100 | S | 8.26 | 57.5 | 97.5 | 156.85 | 35.37115 | -28.96 |
| 81 | AL | 150 | S | 8.26 | 57.5 | 146.25 | 167.20 | 36.6158 | 8.20 |
| 85 | AL | 50 | L | 8.26 | 57.5 | 48.75 | 138.55 | 13.0558 | -37.09 |
| 86 | AL | 100 | L | 8.26 | 57.5 | 97.5 | 155.50 | 13.16435 | -5.40 |
| 87 | AL | 150 | L | 8.26 | 57.5 | 146.25 | 184.64 | 13.00487 | 14.36 |
| 91 | AL | 50 | Loe | 8.26 | 57.5 | 48.75 | 110.29 | 12.09121 | -7.87 |
| 92 | AL | 100 | Loe | 8.26 | 57.5 | 97.5 | 161.93 | 15.67501 | -14.35 |
| 93 | AL | 150 | Loe | 8.26 | 57.5 | 146.25 | 204.62 | 21.03471 | -13.65 |
